# Supplementary material
Source: HighWire-hosted journal article supplement (https://www.rcpjournals.org/highwire/filestream/8497/field_highwire_adjunct_files/3/Shah_supp_file_4.pdf)

Rate of physical violence across six adult mental health wards in Tower Hamlets (U chart)

No. of Incidents per 1000 OBD

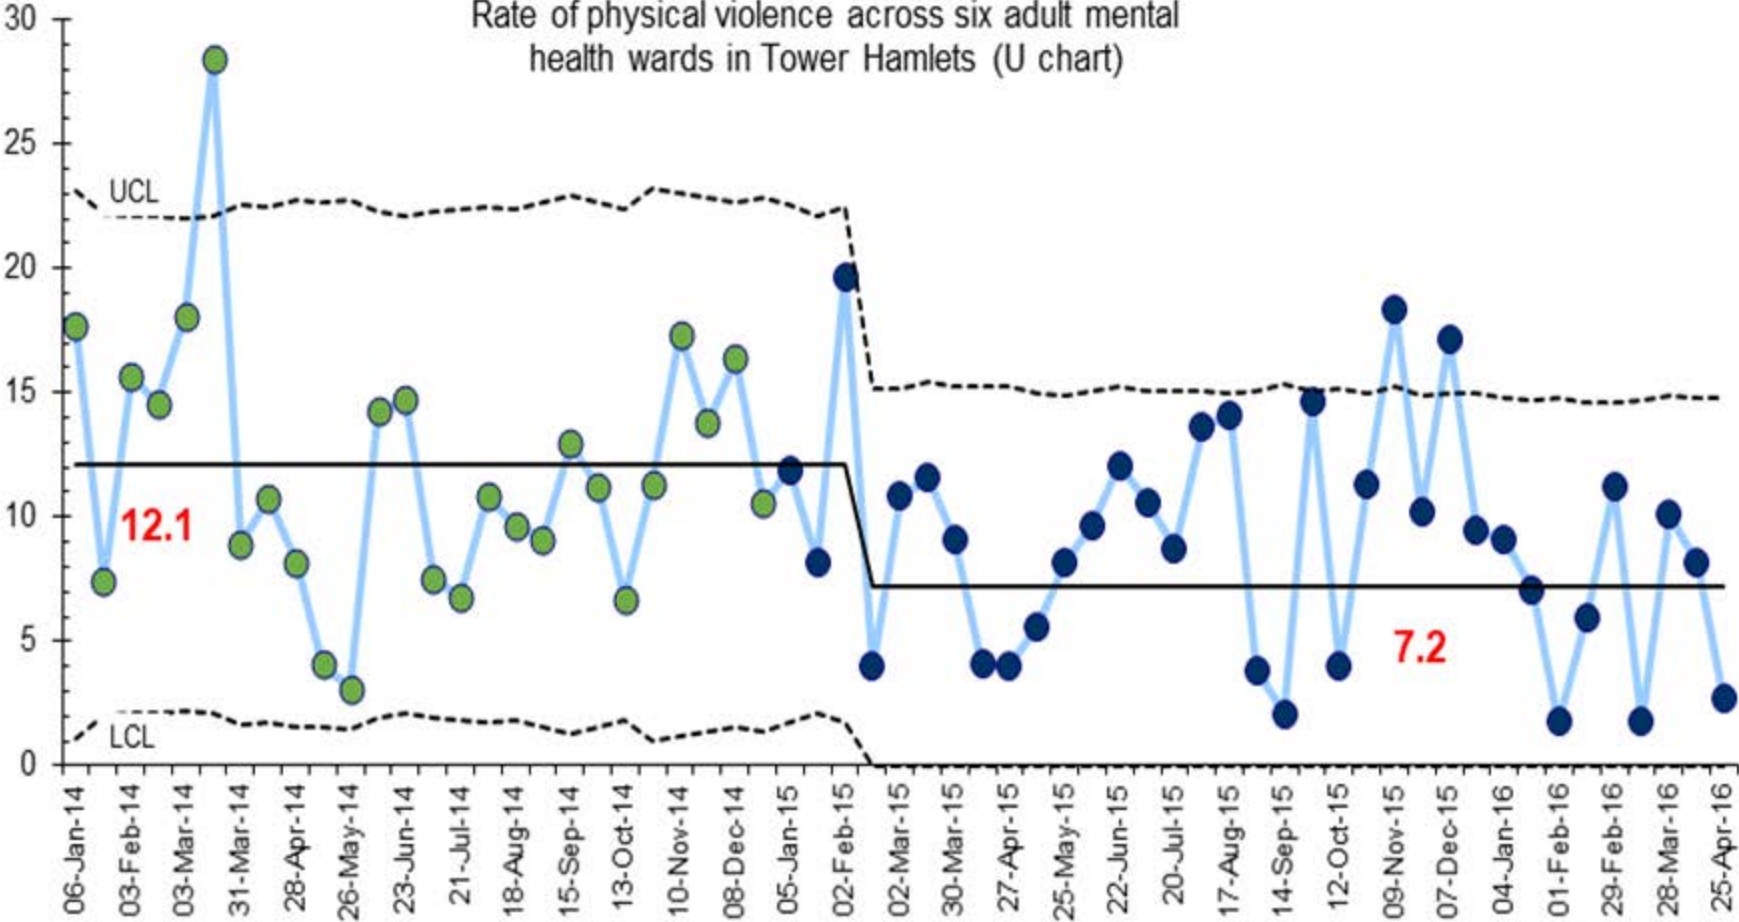

Supplement: Shah_supp_file_4.pdf [file Shah_supp_file_4.pdf]
